# Supplementary material for: Economical and green synthesis of Cu nanowires and their use as a catalyst for selective hydrogenation of cinnamaldehyde
Source: Royal Society of Chemistry journal article supplement (doi:10.1039/c4ra06680d), 2014-08-28
Supplement: c4ra06680d1.pdf [file c4ra06680d1.pdf]

Supported Materials

## Economical and green synthesis of Cu nanowires and their use as catalyst for selective hydrogenation of cinnamaldehyde

Yifan Zheng,<sup>a</sup> Jihong Liang,<sup>a</sup> Yuanyuan Chen,<sup>a</sup> and Zongjian Liu<sup>\*a</sup>

<sup>a</sup> Institute of Industrial Catalysis, College of Chemical Engineering and Materials Science, Zhejiang University of Technology, Hangzhou, 300014, P.R. China;  
E-mail: zjliu@zjut.edu.cn

### The effect of NaNO<sub>3</sub> on the morphology of Cu nanowires.

**Experimental:** The synthesis of Cu nanowires was conducted in a 500 ml round bottom flask. In a typical synthesis, 120 g NaOH was dissolved into 200 ml deionized water to obtain a concentrated NaOH solution. Then 1 mmol of Cu(NO<sub>3</sub>)<sub>2</sub>·3H<sub>2</sub>O and *different amounts of NaNO<sub>3</sub>* were dissolved into this NaOH solution. Finally, 1.5 ml of EDA and 0.25 ml of reducing agent (namely 35 wt.% hydrazine solution) were successively added into the above solution, and the obtained mixture was placed in an 70 °C waterbath without stirring for 1 h. After the reaction, the Cu product was removed from the solution by centrifugation and then dried under vacuum.

### Results (SEM images):

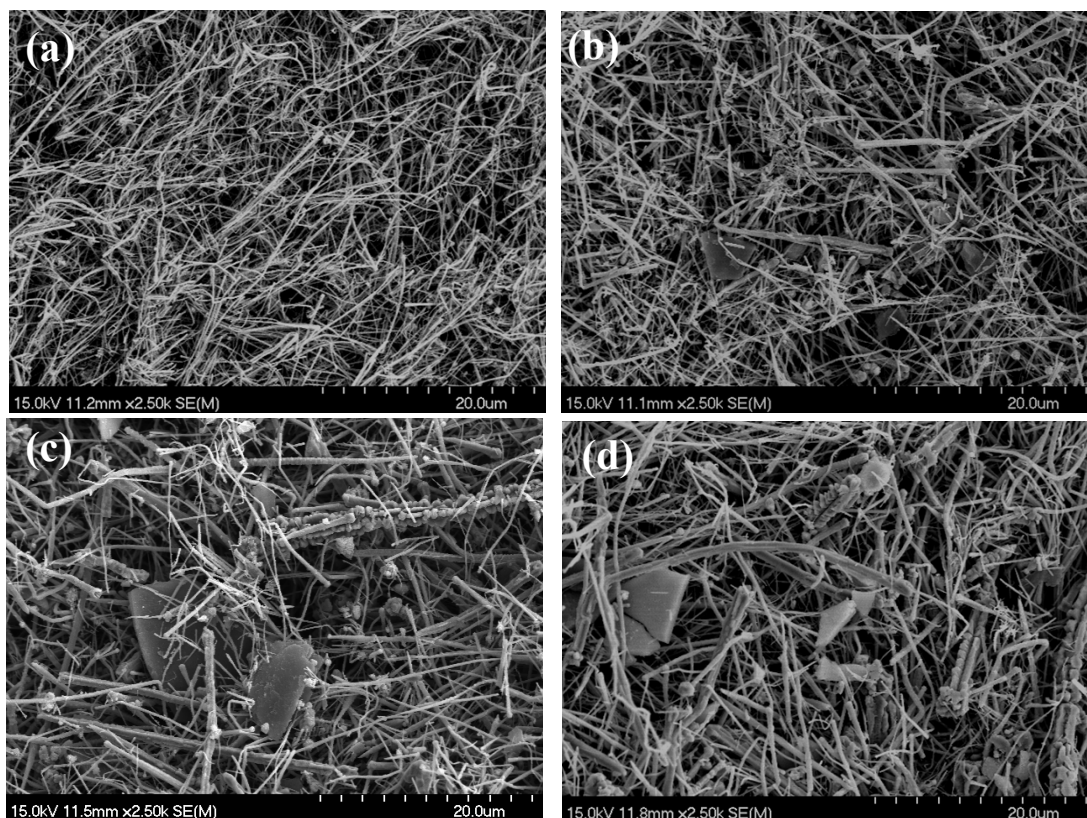

**Figure S1** SEM images of the Cu products formed at 70 °C for 1 h in a reaction mixture containing NaNO<sub>3</sub> of different concentrations: (a) ~0 M, (b) ~1 M, (c) ~2 M, and (d) ~4 M.
